# Supplementary material
Source: Springer Nature journal article supplement (https://www.springermedizin.de/resource/supplementary/12885_2011_2711_MOESM7_ESM.pdf/9461760)

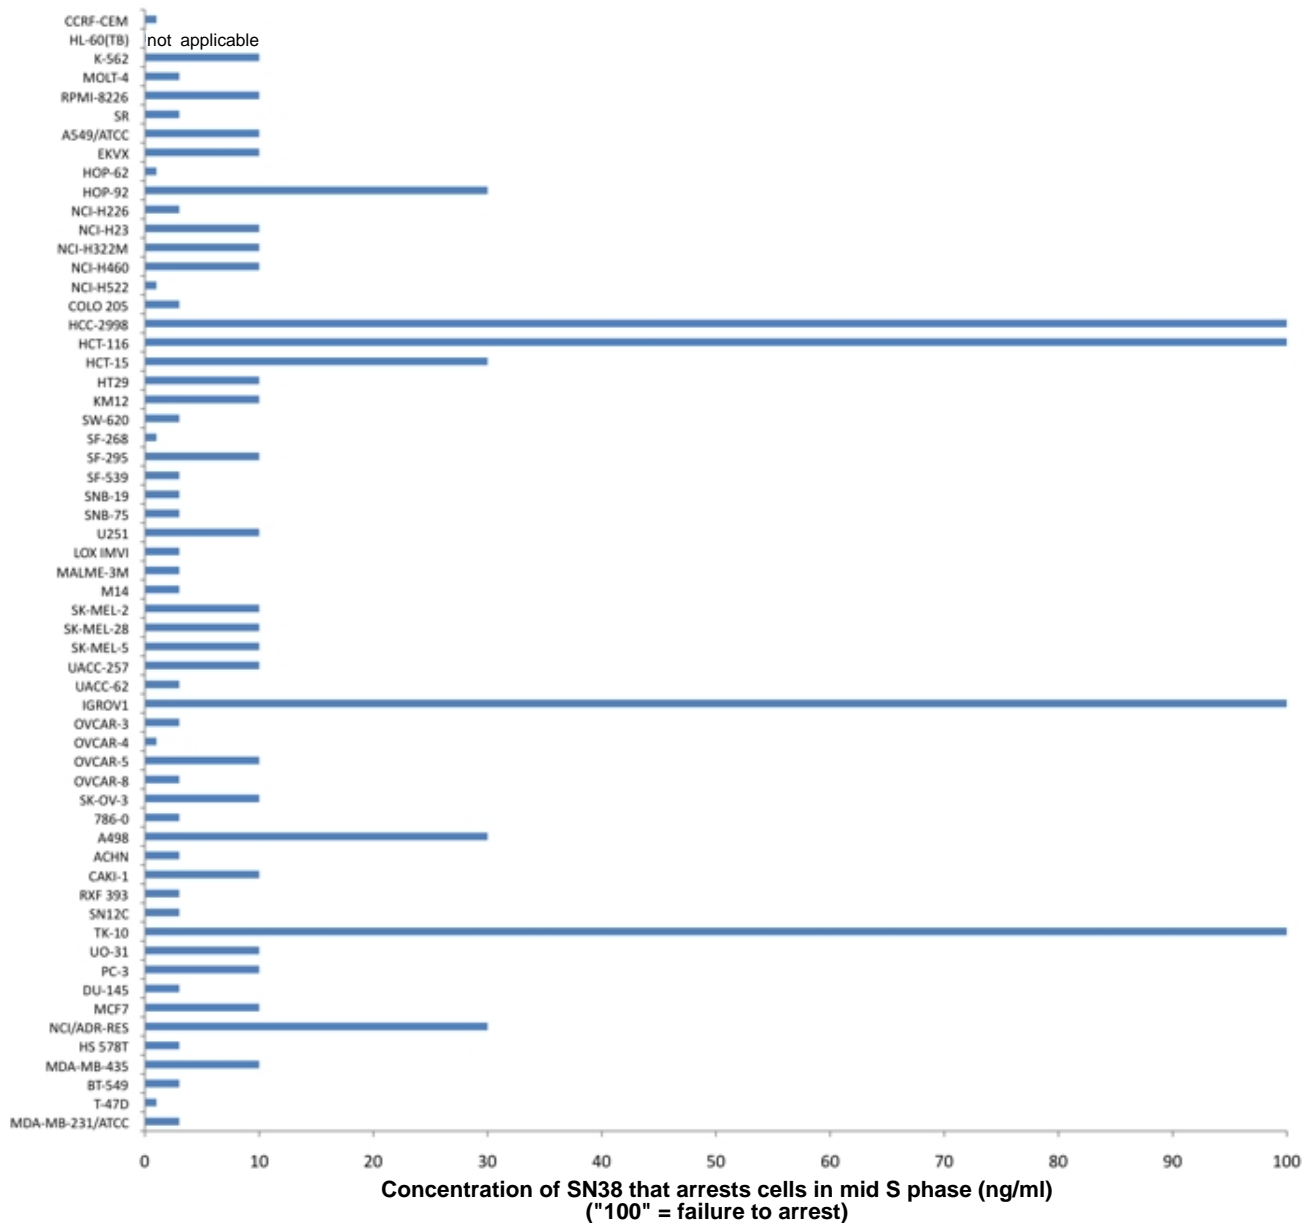

Supplement: MOESM7 [file 9461760]
